# Supplementary material
Source: PubMed Central journal article supplement (PMC3597091)

## Supporting Information

### Indirect Trapping of the Retro-Conjugate Addition Reaction

#### Intermediate Involved in the Epimerization of Lobeline:

#### Application to the Synthesis of (-)-Sedamine

*Guangrong Zheng, Linda P. Dwoskin, and Peter A. Crooks\**

College of Pharmacy, University of Kentucky, Lexington, Kentucky 40536-0082, USA

#### Table of Contents

|          |                                                                          |
|----------|--------------------------------------------------------------------------|
| S2       | General Methods                                                          |
| S3, S4   | <sup>1</sup> H and <sup>13</sup> C NMR spectra of intermediate <b>5</b>  |
| S5, S6   | <sup>1</sup> H and <sup>13</sup> C NMR spectra of intermediate <b>6</b>  |
| S7, S8   | <sup>1</sup> H and <sup>13</sup> C NMR spectra of intermediate <b>8</b>  |
| S9, S10  | <sup>1</sup> H and <sup>13</sup> C NMR spectra of intermediate <b>9</b>  |
| S11, S12 | <sup>1</sup> H and <sup>13</sup> C NMR spectra of intermediate <b>10</b> |

**General Methods.** Reagents obtained from commercial sources were used without further purification. Flash column chromatography was carried out using ICN SilicTech 32-63, 60 Å silica gel. TLC analysis was carried on glass plates precoated with silica gel 60 F<sub>254</sub>. Melting points were determined on a melting point apparatus and are uncorrected. NMR data were obtained for <sup>1</sup>H at 300MHz and <sup>13</sup>C at 75 MHz using CDCl<sub>3</sub> as solvent and are reported in ppm relative to TMS as internal standard. High resolution electron impact ionization mass spectra were recorded at 70eV at a resolution of greater than 10000.

$^1\text{H}$  NMR spectrum of **5** ( $\text{CDCl}_3$ , 300 MHz)

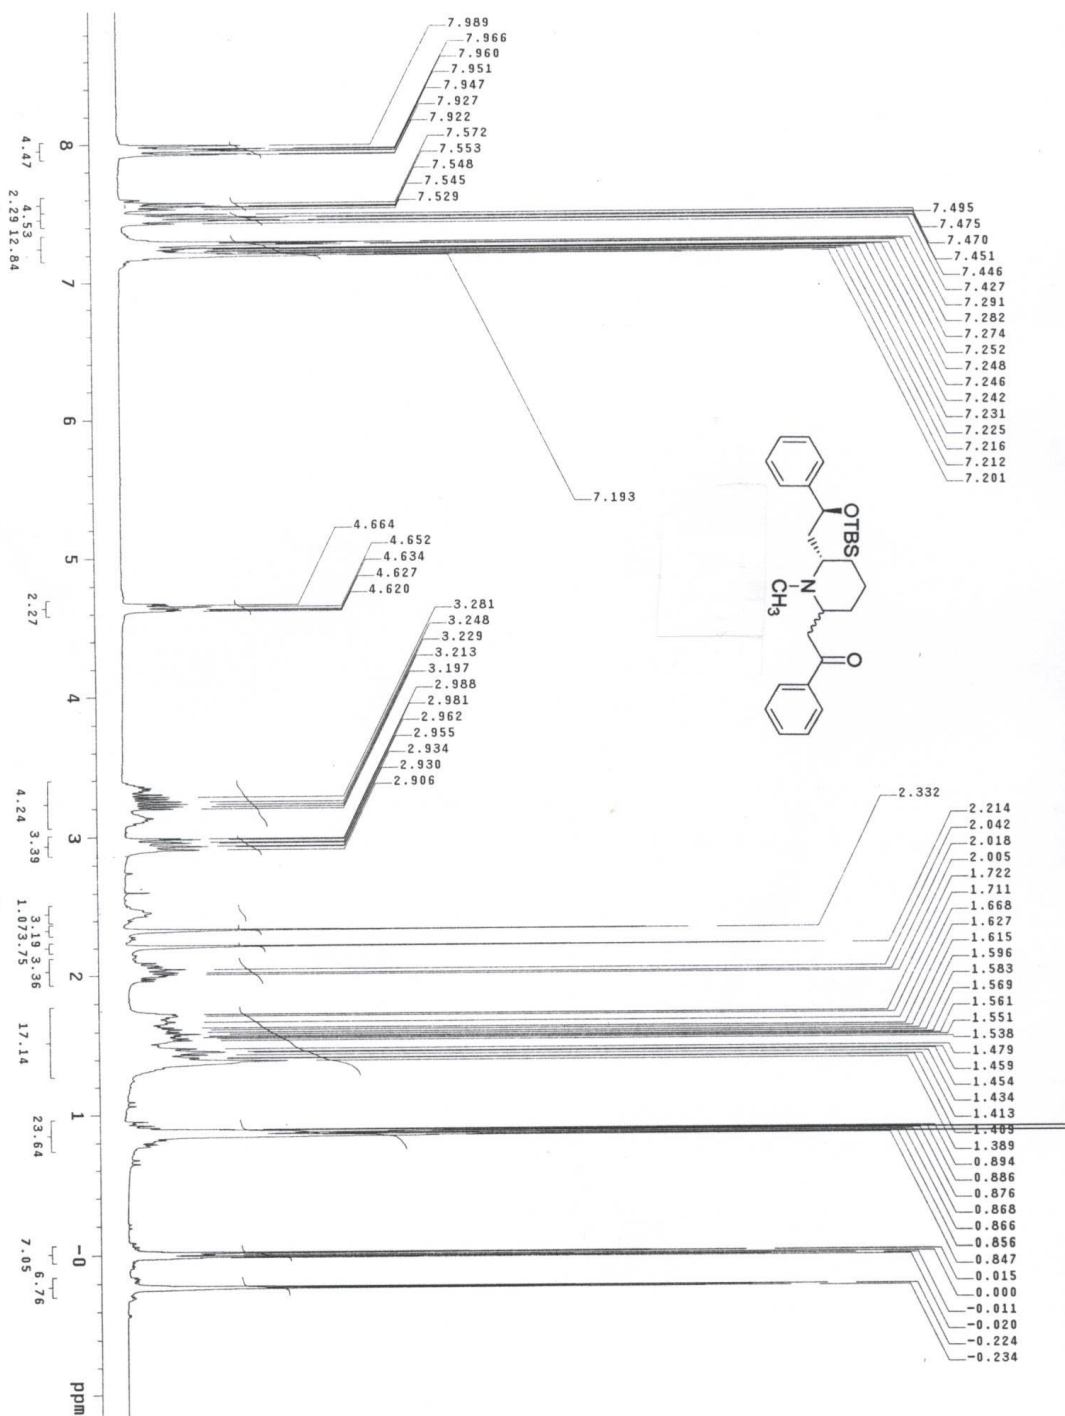

$^{13}\text{C}$  NMR spectrum of **5** ( $\text{CDCl}_3$ , 75 MHz)

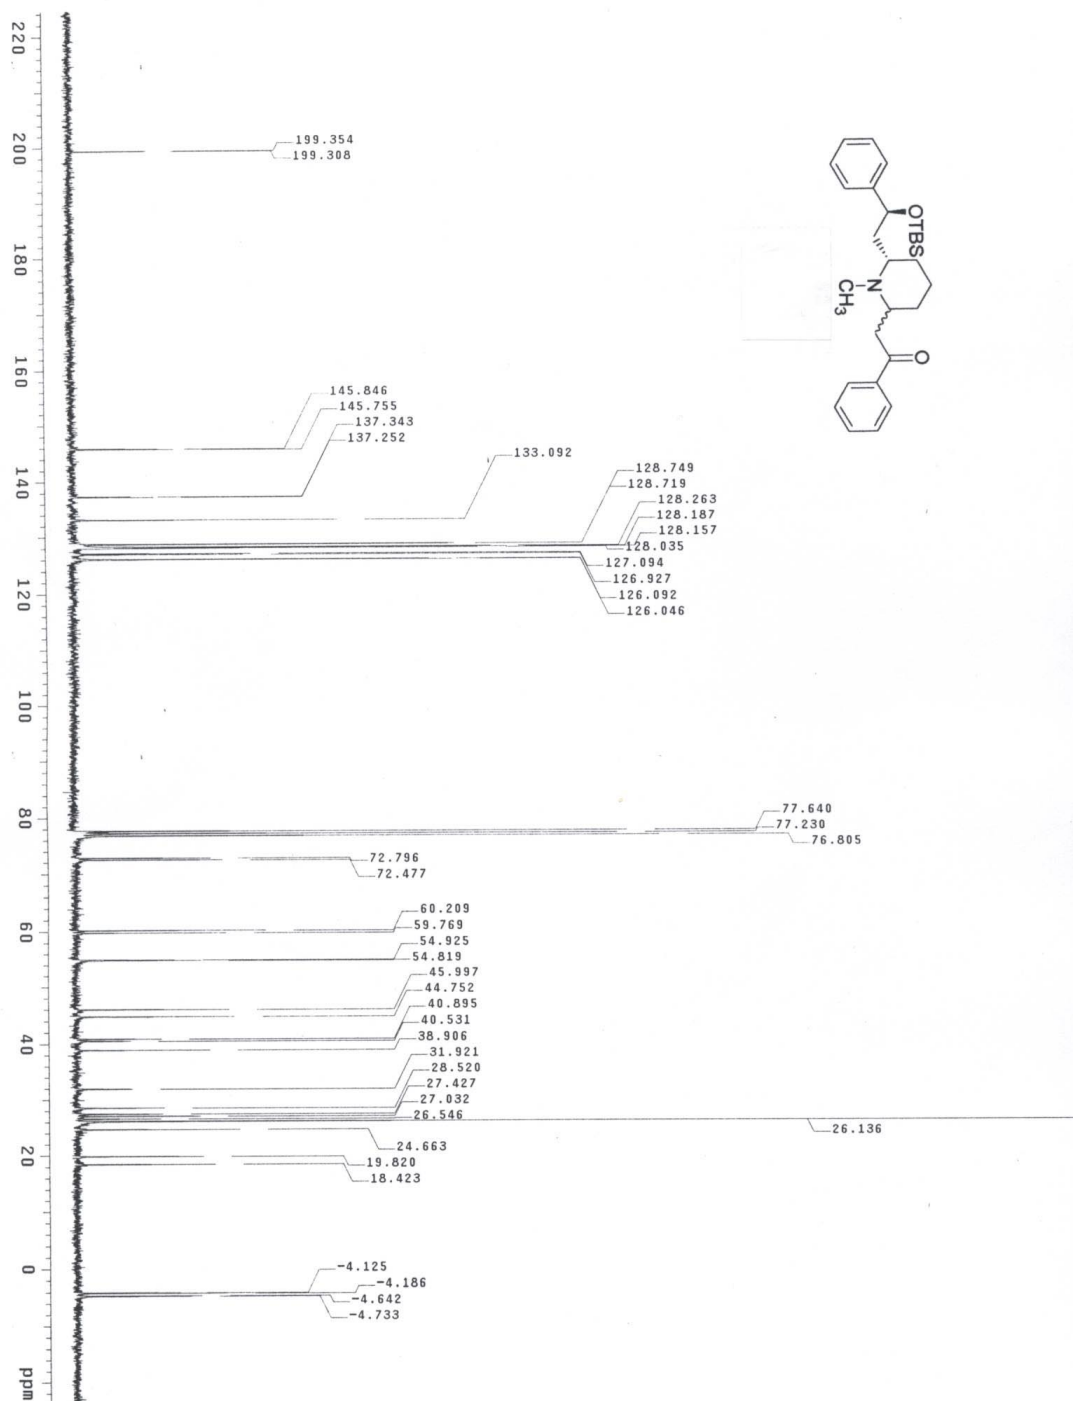



$^{13}\text{C}$  NMR spectrum of **6** ( $\text{CDCl}_3$ , 75 MHz)

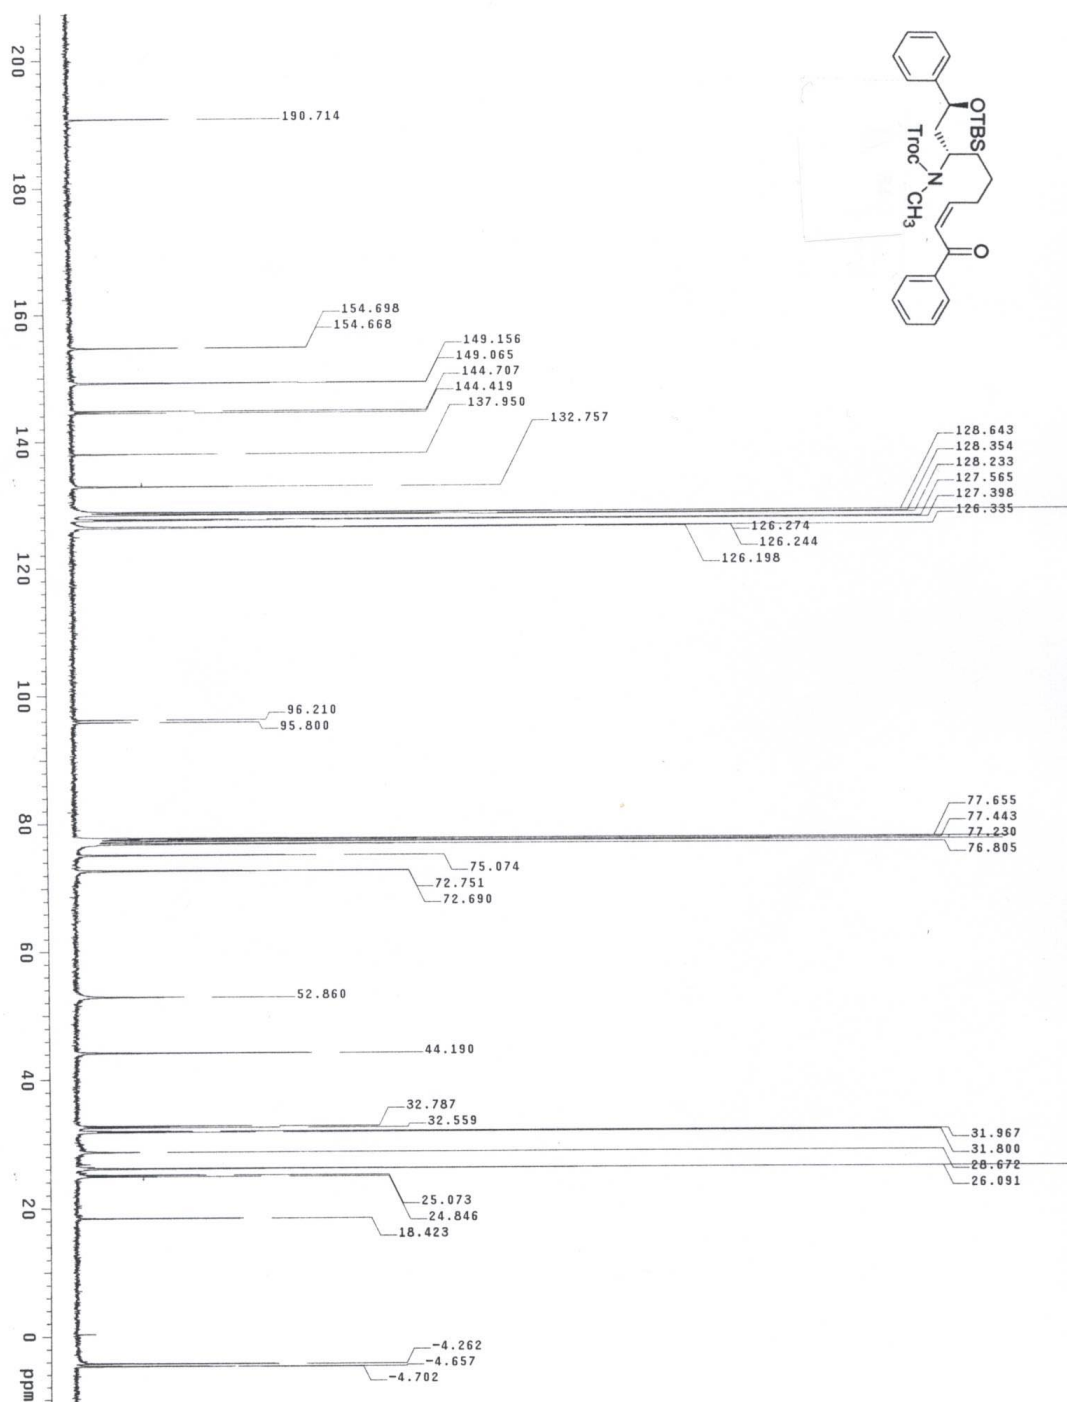

$^1\text{H}$  NMR spectrum of **8** ( $\text{CDCl}_3$ , 300 MHz)

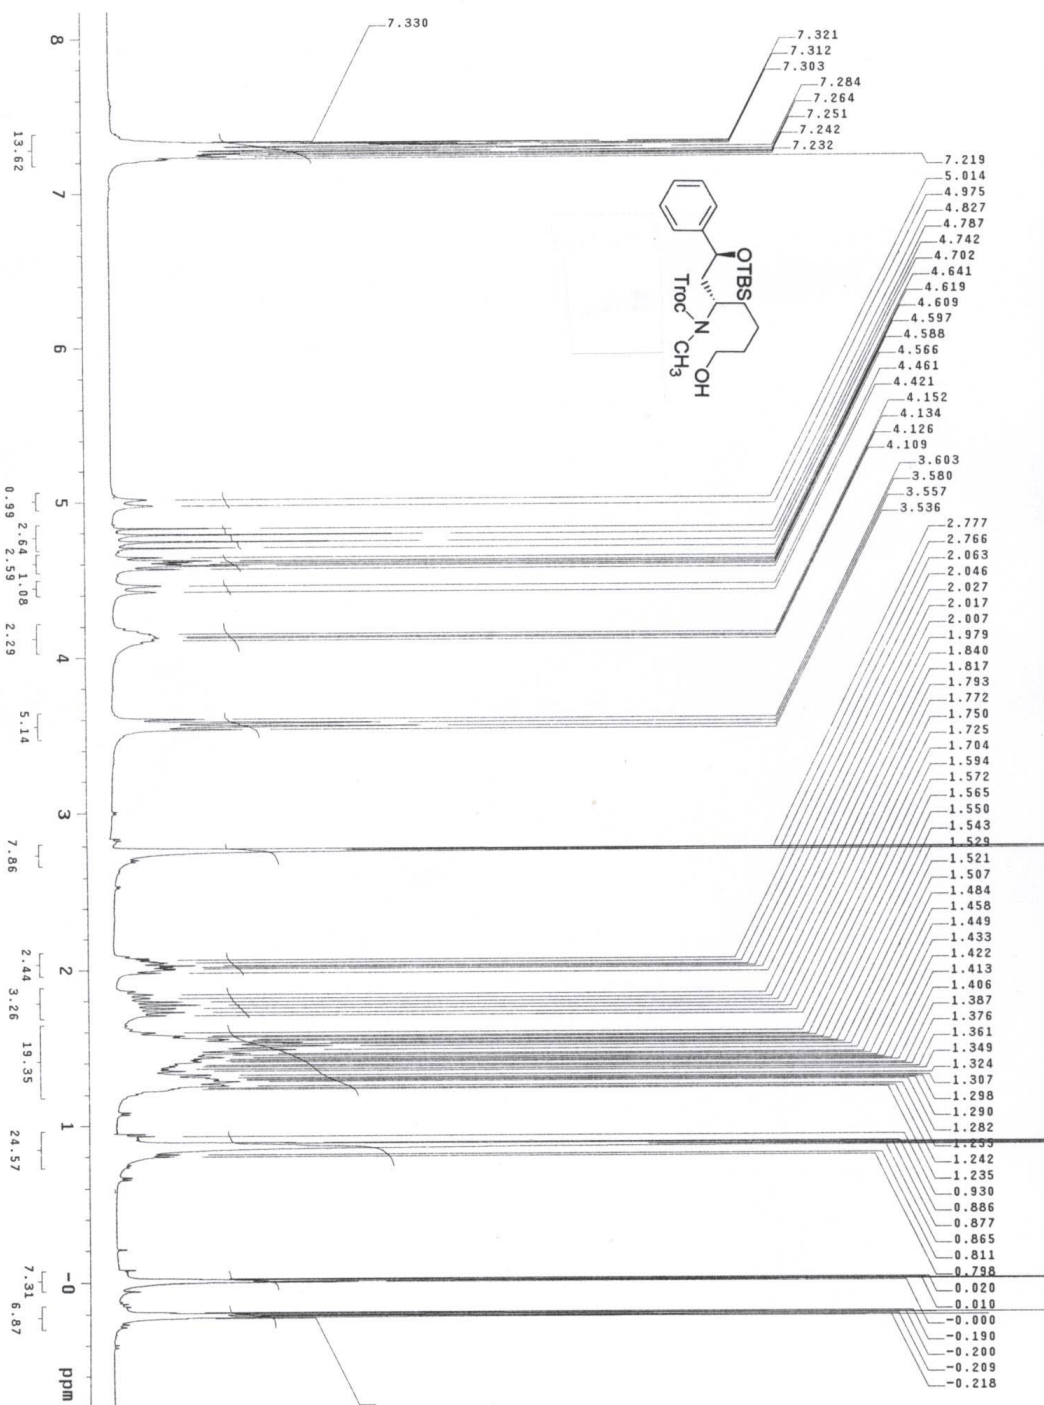





$^1\text{H}$  NMR spectrum of **9** ( $\text{CDCl}_3$ , 300 MHz)

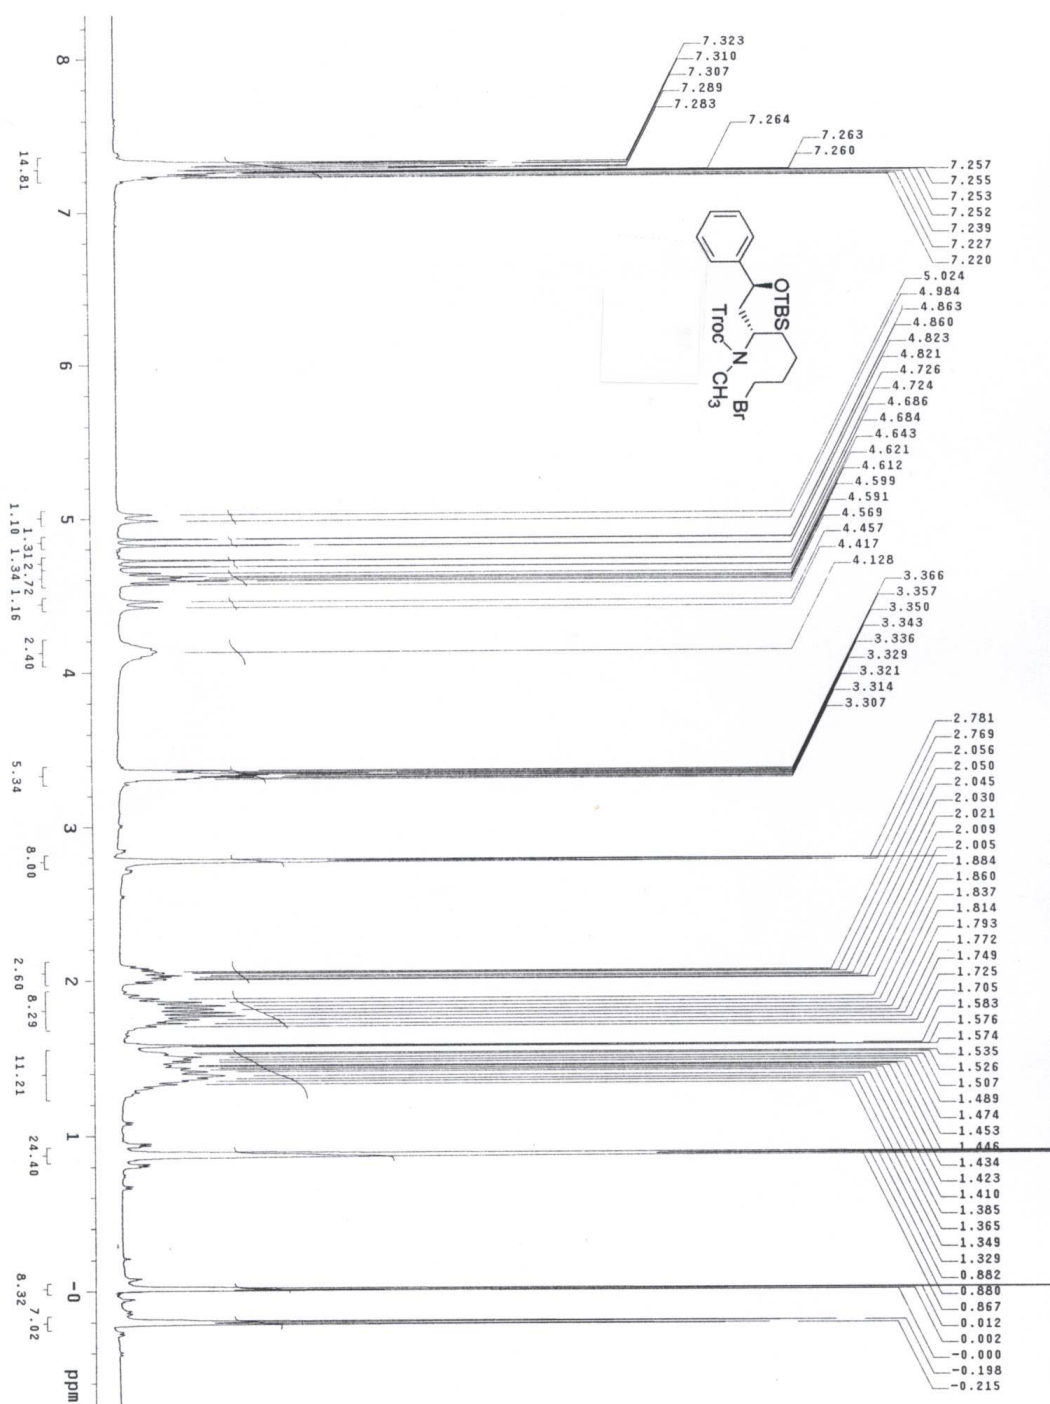



$^1\text{H}$  NMR spectrum of **10** ( $\text{CDCl}_3$ , 300 MHz)

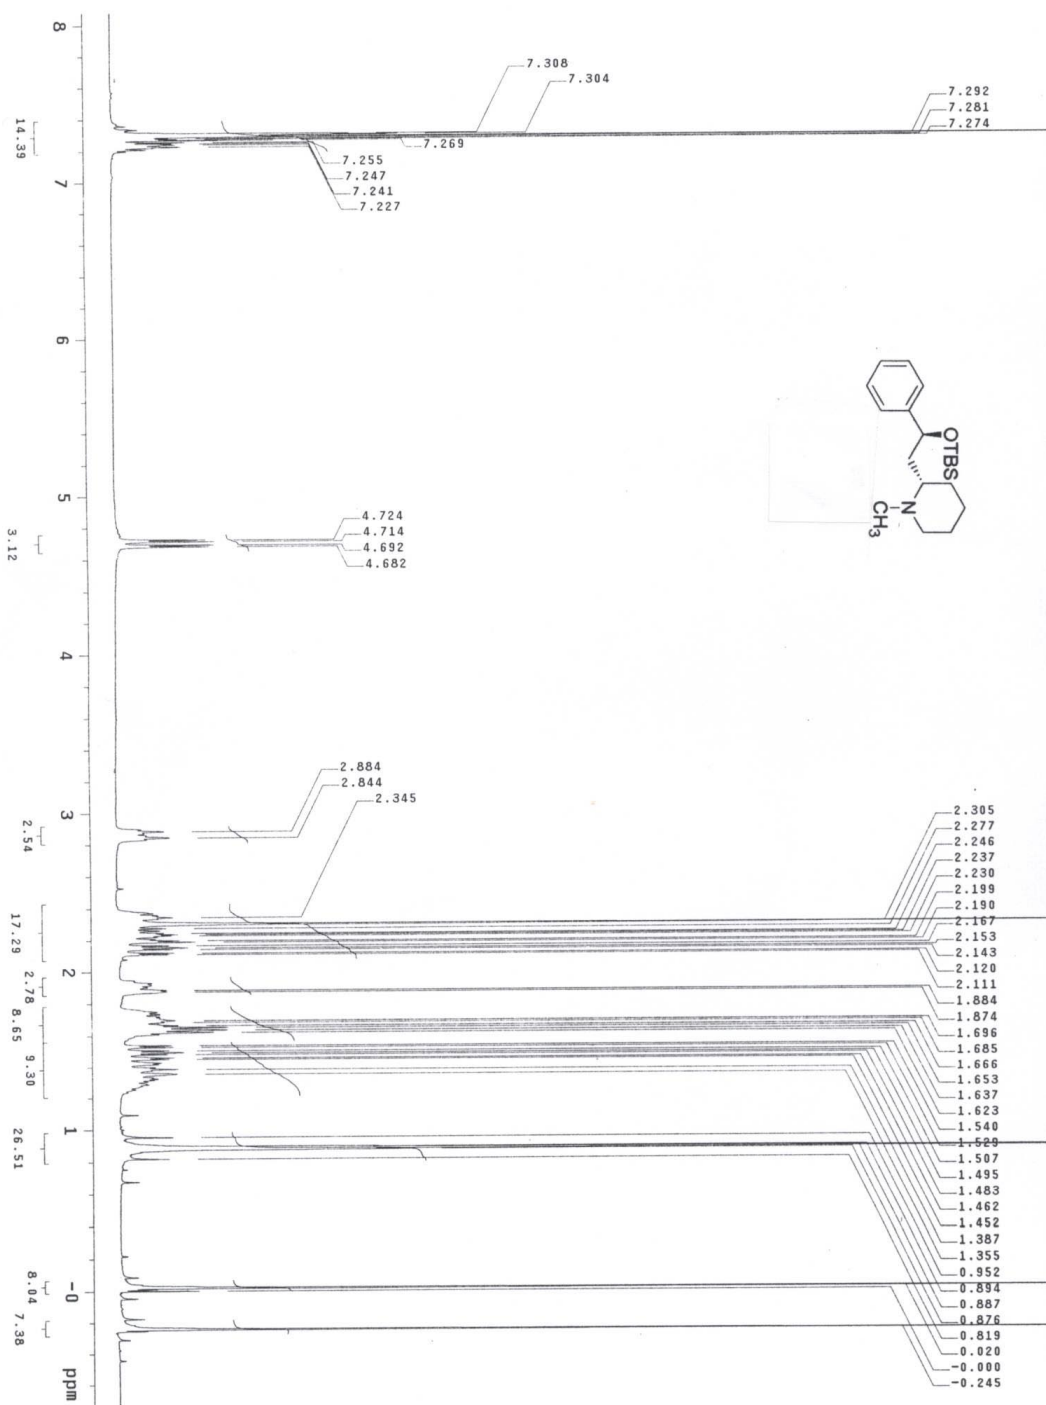

$^{13}\text{C}$  NMR spectrum of **10** ( $\text{CDCl}_3$ , 75 MHz)

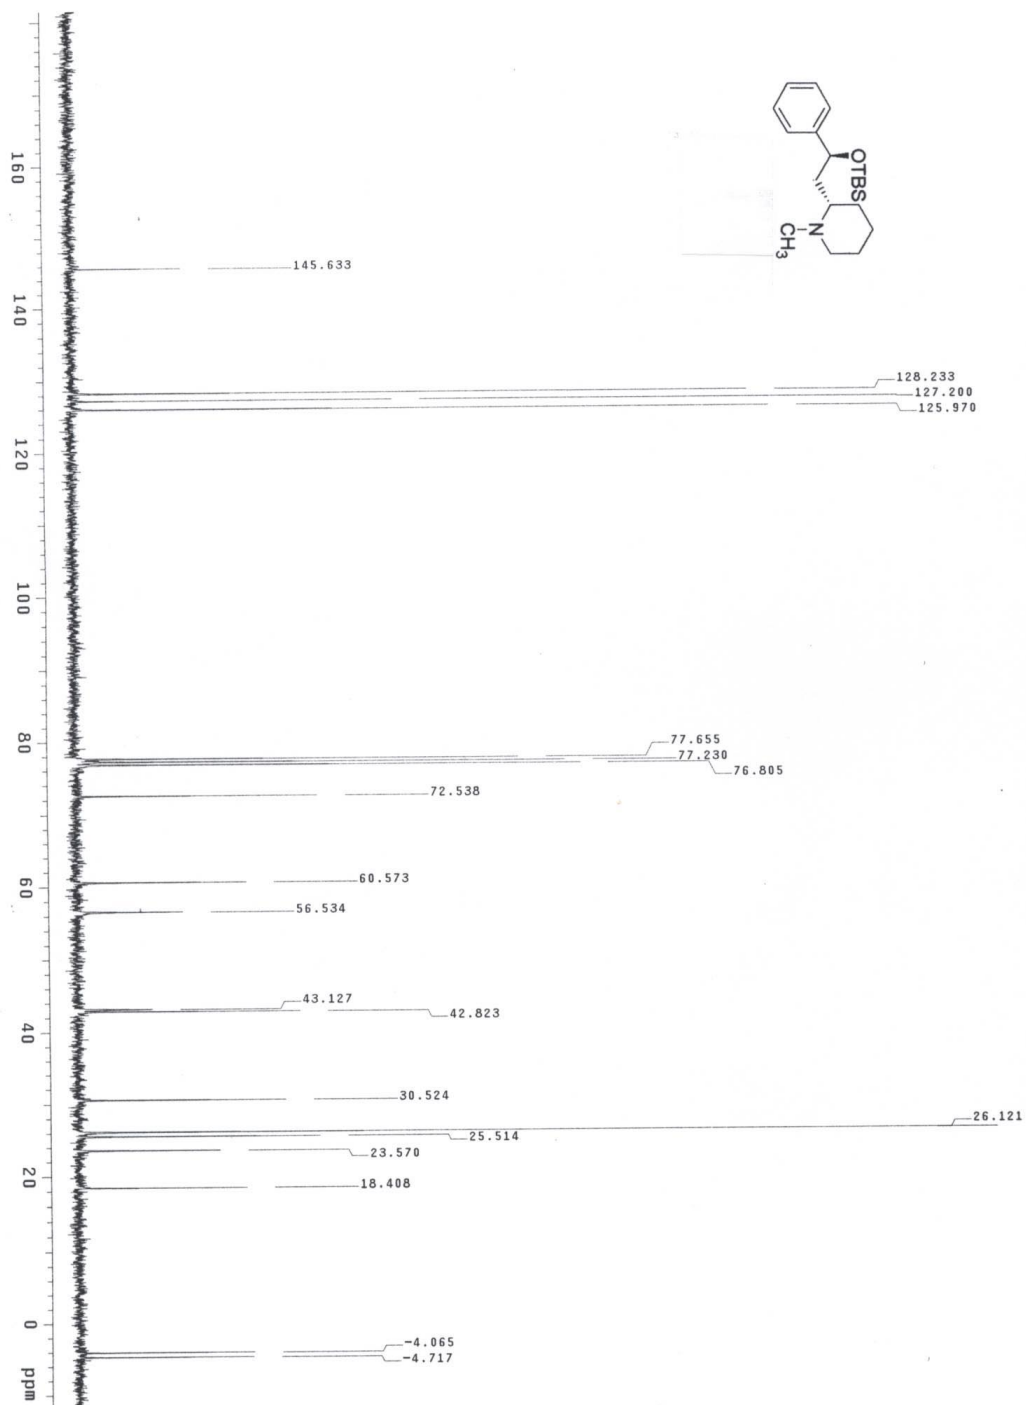

Supplement: NIHMS445974-supplement-jo048848jsi20040909_040331.pdf [file NIHMS445974-supplement-jo048848jsi20040909_040331.pdf]
